# Supplementary material for: Methods to increase response rates to a population-based maternity survey: a comparison of two pilot studies
Source: BMC Med Res Methodol. 2019 Mar 20;19:65. doi: 10.1186/s12874-019-0702-3 (PMC6425628; doi:10.1186/s12874-019-0702-3)

# You & your Baby

A national survey of health and care

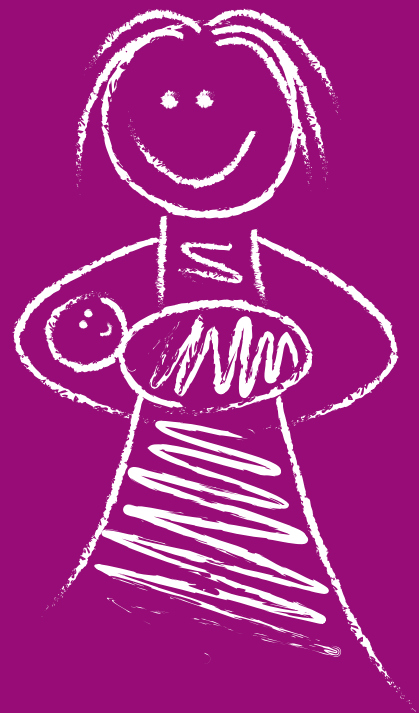

This survey is about you and your baby, your health and wellbeing, your experiences of having a baby, and the care that you both received.

By taking part, the information you share with us will be used to help improve the care that mums and babies receive.

For most questions, make a cross clearly inside one box ☐ or write clearly in the space provided. For some questions, where indicated, you may mark more than one box.

You can complete this survey online by going to:

[www.npeu.ox.ac.uk/maternity-surveys](http://www.npeu.ox.ac.uk/maternity-surveys)

(ID number and password in the small box below)

If you would like to talk to us about the study, please call us on:

Freephone 0808 252 4566

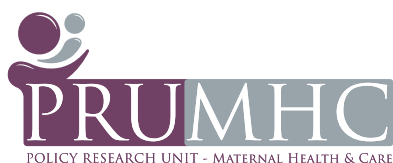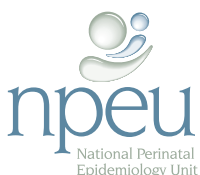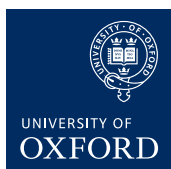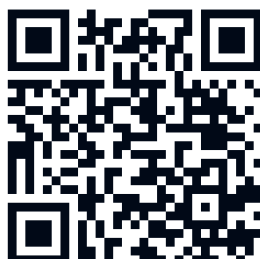



## Part A: Your pregnancy...

*If you have been pregnant before, please only think about your most recent pregnancy when answering these questions.*

**A1. Did you give birth to a single baby, twins or more babies in your most recent pregnancy?**

☐ A single baby   ☐ Twins   ☐ Triplets, quads or more

**A2. If you had a single baby, is your baby...?**

☐ A boy   **OR**   ☐ A girl

**If you had a multiple birth, did you have...?**

☐ All boys   **OR**   ☐ All girls   **OR**   ☐ boy and girl twins, triplets or more

**Note:** *If you had more than one baby in your most recent pregnancy, please fill in the rest of the questionnaire about the baby who was born first as a result of this pregnancy*

**A3. When was your baby born?**

/   /   (date / month / year)

**A4. Roughly how many weeks pregnant were you when your baby was born?**

weeks

**A5. How much did your baby weigh at birth?**

Grams       **OR**   Pounds   and ounces

**A6. Did you plan to get pregnant with this baby?**

☐ Yes   ☐ No

**A7. Roughly how many weeks pregnant were you when you had your pregnancy 'booking'?**

*(the appointment where you were given your hand held pregnancy records/notes)*

weeks

**A8. At the time of your pregnancy booking or a few weeks later were you asked about your emotional and mental health?**

☐ Yes   ☐ No   ☐ Not sure / Don't know

**A9. Did you have a mental health problem during your pregnancy?**

☐ Yes   ☐ No   ☐ Not sure / Don't know

**If Yes, was this?** *Please tick all that apply*

☐ Anxiety?

☐ Depression?

☐ Other condition? Please give details: \_\_\_\_\_

**Was this a problem you had before this pregnancy?**

☐ Yes   ☐ No

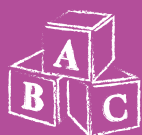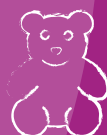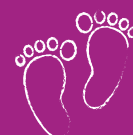

## Part B: Pregnancy check-ups...

A 'check-up' is any contact with a midwife or a doctor to check the progress of your pregnancy. This usually includes having your blood pressure and urine checked.

Please ignore other appointments that did not include these things, such as a visit for a scan or a blood test only.

### B1. Roughly how many check-ups did you have at each of these places?

Please write in the number for each

Local clinic

Children's centre

GP surgery

Hospital clinic

At home

### B2. During your pregnancy how many ultrasound scans (showing your baby on a screen) did you have in total?

 

### B3. Altogether, how many different midwives looked after you during your pregnancy?

Tick one box only

☐ One ☐ Two ☐ Three ☐ Four ☐ Five or more

## Part C: Your labour and the birth of your baby...

### C1. Before you went into labour or had your baby did you have any particular worries about the labour and birth? Please tick one box for each line

|                                         | Very worried             | Quite worried            | Not very worried         | Not at all worried       |
|-----------------------------------------|--------------------------|--------------------------|--------------------------|--------------------------|
| Not knowing when I would go into labour | <input type="checkbox"/> | <input type="checkbox"/> | <input type="checkbox"/> | <input type="checkbox"/> |
| Getting to the hospital in time         | <input type="checkbox"/> | <input type="checkbox"/> | <input type="checkbox"/> | <input type="checkbox"/> |
| Having to be induced                    | <input type="checkbox"/> | <input type="checkbox"/> | <input type="checkbox"/> | <input type="checkbox"/> |
| Having a long labour                    | <input type="checkbox"/> | <input type="checkbox"/> | <input type="checkbox"/> | <input type="checkbox"/> |
| Pain and discomfort of labour           | <input type="checkbox"/> | <input type="checkbox"/> | <input type="checkbox"/> | <input type="checkbox"/> |
| Getting effective pain relief           | <input type="checkbox"/> | <input type="checkbox"/> | <input type="checkbox"/> | <input type="checkbox"/> |
| Not knowing how long labour would take  | <input type="checkbox"/> | <input type="checkbox"/> | <input type="checkbox"/> | <input type="checkbox"/> |
| Having a forceps or ventouse delivery   | <input type="checkbox"/> | <input type="checkbox"/> | <input type="checkbox"/> | <input type="checkbox"/> |
| Embarrassment                           | <input type="checkbox"/> | <input type="checkbox"/> | <input type="checkbox"/> | <input type="checkbox"/> |
| Needing a caesarean                     | <input type="checkbox"/> | <input type="checkbox"/> | <input type="checkbox"/> | <input type="checkbox"/> |
| Other, please give details:<br>_____    | <input type="checkbox"/> | <input type="checkbox"/> | <input type="checkbox"/> | <input type="checkbox"/> |

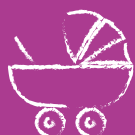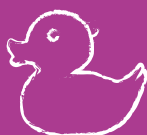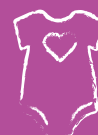

**C2. Where was your baby born?** *Please tick one box only*

- ☐ At home
- ☐ In a midwife-led unit or birth centre separate from hospital
- ☐ In hospital, in a midwife-led unit (*in the same hospital, but separate from the consultant-led unit*)
- ☐ In hospital, in a consultant-led unit (obstetric unit)
- ☐ Other, please give details: \_\_\_\_\_

**C3. Did you have a labour?**

- ☐ Yes ☐ No **If No, please go to Question D1**

**C4. How did your labour start?** *Please tick all that apply*

- ☐ It started naturally
- ☐ I had one or more membrane sweeps
- ☐ I was given a vaginal gel or pessary to induce my labour
- ☐ My waters were broken by a doctor or a midwife (amniotomy)
- ☐ I was given a drip (in my hand or arm) to induce my labour

**C5. During your labour, did you use any of these for pain relief?** *Please tick all that apply*

- ☐ Gas and air (breathing through a mask)
- ☐ Injection of pethidine or a similar painkiller
- ☐ Epidural or similar (injection in your back)
- ☐ Other, please give details: \_\_\_\_\_

## Part D: The birth of your baby...

**D1. How was your baby born?** *Please tick one box only*

- ☐ Normal (vaginal) birth
- ☐ Delivery using forceps
- ☐ Delivery using vacuum cap on the baby's head (ventouse)
- ☐ A caesarean (through a cut in the abdomen)

**If your baby was born by caesarean was this...** *Please tick one box only*

- ☐ Planned and carried out before you went into labour?
- ☐ Planned, but carried out after you had gone into labour?
- ☐ The result of an unforeseen problem during your labour?

**If you had a caesarean birth this time, please go to Question D4**

**D2. If you had a vaginal birth, while your baby was being born did you have an episiotomy (cut) to assist with the delivery of the baby?**

- ☐ Yes ☐ No ☐ Don't know / Can't remember

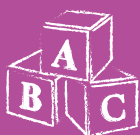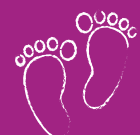

**D3. If you had a vaginal birth, while your baby was being born did you have a tear (not a deliberate cut)?** *Please tick one box only*

- ☐ No
- ☐ Yes, a tear that did not need stitches
- ☐ Yes, a tear that needed stitches
- ☐ Yes, a serious tear which involved my back passage (third or fourth degree tear)
- ☐ Don't know / Can't remember

**Please answer the following questions if you had a vaginal birth OR a caesarean.**

**D4. Women have different experiences of labour and birth. How much do you agree or disagree with the following statements?** *Please circle one number on each row*

|                                                                                                 | Strongly Agree | Agree | Neither agree or disagree | Disagree | Strongly Disagree |
|-------------------------------------------------------------------------------------------------|----------------|-------|---------------------------|----------|-------------------|
| I came through childbirth virtually unscathed                                                   | 1              | 2     | 3                         | 4        | 5                 |
| I thought my labour was excessively long                                                        | 1              | 2     | 3                         | 4        | 5                 |
| The delivery room staff encouraged me to take decisions about how I wanted my birth to progress | 1              | 2     | 3                         | 4        | 5                 |
| I felt very anxious during my labour and birth                                                  | 1              | 2     | 3                         | 4        | 5                 |
| I felt well supported by staff during my labour and birth                                       | 1              | 2     | 3                         | 4        | 5                 |
| The staff communicated well with me during labour                                               | 1              | 2     | 3                         | 4        | 5                 |
| I found giving birth a distressing experience                                                   | 1              | 2     | 3                         | 4        | 5                 |
| I felt out of control during my birth experience                                                | 1              | 2     | 3                         | 4        | 5                 |
| I was not distressed at all during labour                                                       | 1              | 2     | 3                         | 4        | 5                 |
| The delivery room was clean and hygienic                                                        | 1              | 2     | 3                         | 4        | 5                 |

**D5. Altogether, how many different midwives looked after you during your labour and/or the birth of your baby?** *Please tick one box only*

- ☐ One ☐ Two ☐ Three ☐ Four ☐ Five or more

**D6. Had you met any of the midwives before you went into labour or gave birth?**

*Please tick one box only*

- ☐ All of them ☐ Some of them ☐ None of them

**D7. How soon after birth did you...**

Hold your baby?

minutes   hours   days

Have skin-to-skin contact with your baby

minutes   hours   days

*(By skin-to-skin contact we mean you were holding the baby so that his/her bare skin was next to your bare skin)*



**D8. Overall, how do you feel your labour and birth went?** *Please tick one box only*

- ☐ Worse than you expected  
☐ More or less as you expected  
☐ Better than you expected

**D9. We would like to know how you feel you were looked after during your labour and birth. Please circle any of the words below which describe the staff you saw during labour.** *Circle as many as you wish*

- |             |           |               |               |
|-------------|-----------|---------------|---------------|
| rushed      | humorous  | insensitive   | kind          |
| considerate | unhelpful | supportive    | offhand       |
| rude        | warm      | inconsiderate | polite        |
| sensitive   | bossy     | informative   | condescending |

## Part E: After the birth of your baby...

**E1. Did you stay in a maternity unit or hospital after your baby was born?**

- ☐ Yes ☐ No

**If Yes,** how long did you stay in the maternity unit (or hospital) after your baby was born?

hours **OR**   days

*After birth some babies need specialist care, e.g. help with breathing, and are admitted to a neonatal unit, sometimes called a Special Care Baby Unit (SCBU) or Neonatal Intensive Care Unit (NICU).*

**E2. Was your baby cared for in a neonatal unit at all?**

- ☐ Yes ☐ No

**If Yes,** for how long?

hours **OR**   days **OR**   weeks **OR**   months  
**OR** ☐ My baby is still being cared for in a neonatal unit

**E3. After the birth of your baby, how many times in total did you...**

- ... see a midwife or maternity support worker at home?   times  
... see a midwife or maternity support worker at a drop in clinic?   times  
... have contact with a midwife or maternity support worker by phone?   times

**E4. How many different midwives in total visited you at home after your baby was born?**

*Please tick one box only*

- ☐ One ☐ Two ☐ Three or more

**E5. Had you met any of these midwives before you had your baby?** *Please tick one box only*

- ☐ All of them ☐ Some of them ☐ None of them



**E6. Parents' experiences with a baby vary a great deal. How have the following been for you during the months since your baby was born?** *Please tick one box for each row*

|                                                     | Very difficult           | Quite difficult          | Not very difficult       | Not at all difficult     | Does not apply           |
|-----------------------------------------------------|--------------------------|--------------------------|--------------------------|--------------------------|--------------------------|
| Understanding what your baby needs                  | <input type="checkbox"/> |
| Tiredness and lack of sleep                         | <input type="checkbox"/> |
| The changes in your partner relationship            | <input type="checkbox"/> |
| Getting everything done                             | <input type="checkbox"/> |
| Feeling you are doing the right thing for your baby | <input type="checkbox"/> |
| Organising family life                              | <input type="checkbox"/> |
| Adjusting to having a young baby around             | <input type="checkbox"/> |
| Loss of independence                                | <input type="checkbox"/> |

## Section F: Feeding your baby...

*Note. When we ask about 'breastfeeding' we also mean 'giving your baby expressed breast milk'*

**F1. Did you ever try to breastfeed your baby, even if it was only once?**

☐ Yes ☐ No **If No, please go to Question F3**

**F2. How old was your baby when he or she was last given breast milk?**

days **OR**  weeks **OR**  months

**OR** ☐ My baby is still being given breast milk

**F3. In the first few days after the birth how was your baby fed?** *Please tick one box only*

- ☐ Breast milk (or expressed breast milk) only  
☐ Both breast and formula (bottle) milk  
☐ Formula (bottle) milk only  
☐ Not sure

**F4. Would you have liked more help from a health professional with breastfeeding your baby?**

☐ Yes ☐ No

**F5. How is your baby fed now? (in the last 24 hours)** *Please tick one box only*

- ☐ Formula (bottle) milk only  
☐ Breast milk (or expressed breast milk) only  
☐ Both breast and formula (bottle) milk  
☐ Other, please give details: \_\_\_\_\_



## Part G: Your baby...

**G1. When did you first feel your baby really belonged to you?** *Please tick one box only*

- ☐ During your pregnancy  
☐ Immediately after birth  
☐ In the first few days  
☐ In the first few weeks  
☐ Only recently  
☐ Not quite yet

**G2. How would you describe your baby as he or she is now?** *Please read the list and circle as many words as you like which best describe your baby*

|            |           |          |               |
|------------|-----------|----------|---------------|
| placid     | stubborn  | cuddly   | unresponsive  |
| grizzly    | active    | angry    | alert         |
| responsive | demanding | sociable | inactive      |
| withdrawn  | happy     | fretful  | communicative |

**G3. Compared to other babies, how would you describe your baby?** *Please tick one box only*

- ☐ More difficult than most   ☐ About average   ☐ Easier than most

**G4. Does your baby have any health problems now?**

- ☐ No   ☐ Yes, please give details: \_\_\_\_\_

**G5. How much do you worry about your child's health and development?**

*Please tick one box only*

- ☐ A great deal   ☐ Quite a lot   ☐ Not very much   ☐ Not at all

## Part H: Your health and wellbeing...

**H1. Overall, how have you felt physically during the last few days?** *Please tick one box only*

- ☐ Very well   ☐ Quite well   ☐ Quite unwell   ☐ Very unwell

**H2. Overall, how tired have you felt during the last few days?** *Please tick one box only*

- ☐ Not very tired   ☐ Quite tired   ☐ Very tired   ☐ Exhausted all the time

**H3. Over the last 2 weeks, how often have you been bothered by the following problems?**

*Please circle one answer for each row*

| Feeling nervous, anxious, or on edge       | Not at all | Several days | More than half the days | Nearly every day |
|--------------------------------------------|------------|--------------|-------------------------|------------------|
| Not being able to stop or control worrying | Not at all | Several days | More than half the days | Nearly every day |

**H4. Did you have a postnatal check-up of your own health with your GP / family doctor (usually between 4–8 weeks after the birth)?**

- ☐ Yes   ☐ No



**H5. Since your baby was born have you been asked about your emotional and mental health by a health professional?**

☐ Yes ☐ No ☐ Don't know / Can't remember

**H6. Did you experience any of the following after the birth of your baby?**

*Please tick all that apply*

|                                          | 10 days after<br>the baby's<br>birth | 1 month after<br>the baby's<br>birth | 1 month after<br>the baby's<br>birth |
|------------------------------------------|--------------------------------------|--------------------------------------|--------------------------------------|
| 'The blues'                              | <input type="checkbox"/>             | <input type="checkbox"/>             | <input type="checkbox"/>             |
| Painful stitches or wound                | <input type="checkbox"/>             | <input type="checkbox"/>             | <input type="checkbox"/>             |
| Depression                               | <input type="checkbox"/>             | <input type="checkbox"/>             | <input type="checkbox"/>             |
| Stress incontinence (leaking urine)      | <input type="checkbox"/>             | <input type="checkbox"/>             | <input type="checkbox"/>             |
| Fatigue / severe tiredness               | <input type="checkbox"/>             | <input type="checkbox"/>             | <input type="checkbox"/>             |
| Anxiety                                  | <input type="checkbox"/>             | <input type="checkbox"/>             | <input type="checkbox"/>             |
| Sleep problems (not related to the baby) | <input type="checkbox"/>             | <input type="checkbox"/>             | <input type="checkbox"/>             |
| 'Flash-backs' to the labour or birth     | <input type="checkbox"/>             | <input type="checkbox"/>             | <input type="checkbox"/>             |
| Relationship problems                    | <input type="checkbox"/>             | <input type="checkbox"/>             | <input type="checkbox"/>             |
| Difficulties in concentrating            | <input type="checkbox"/>             | <input type="checkbox"/>             | <input type="checkbox"/>             |
| Other, please give details:<br>_____     | <input type="checkbox"/>             | <input type="checkbox"/>             | <input type="checkbox"/>             |
| None of these                            | <input type="checkbox"/>             | <input type="checkbox"/>             | <input type="checkbox"/>             |

**H7. We would like to know how you have been feeling in the last week.** *Please circle as many of the words below as you like which describe how you have been feeling in the last 7 days*

|           |           |           |            |
|-----------|-----------|-----------|------------|
| Calm      | Tense     | Relaxed   | Upset      |
| Irritable | Happy     | Miserable | Excited    |
| Confident | Drained   | Fulfilled | Nervous    |
| Exhausted | Contented | Low       | Optimistic |
| Cheerful  | Angry     | Energetic | Impatient  |
| Restless  | Grateful  | Worried   | Satisfied  |

☐ None of these words describe how I have been feeling in the last seven days

Are there any other words that describe how you have been feeling?



**H8. I generally feel good about myself:** *Please circle one number only*

Not very true of me    1    2    3    4    5    6    7    Very true of me

**H9. The following questions deal with your feelings. How have you felt over the last 7 days, not just today?** *Please circle one answer for each row*

|                                                            |                           |                            |                                |                 |
|------------------------------------------------------------|---------------------------|----------------------------|--------------------------------|-----------------|
| I have been able to laugh and see the funny side of things | As much as I always could | Not quite so much now      | Definitely not so much now     | Not at all      |
| I have looked forward with enjoyment to things             | As much as I ever did     | Rather less than I used to | Definitely less than I used to | Hardly at all   |
| I have blamed myself unnecessarily when things went wrong  | Yes, most of the time     | Yes, some of the time      | Not very often                 | No, never       |
| I have been anxious or worried for no good reason          | No, not at all            | Hardly ever                | Yes, sometimes                 | Yes, very often |
| I have felt scared or panicky for no very good reason      | Yes, quite a lot          | Yes, sometimes             | No, not much                   | No, not at all  |
| Things have been getting on top of me                      | Yes, most of the time     | Yes, sometimes             | No, not very often             | No, not at all  |
| I have been so unhappy that I have had difficulty sleeping | Yes, most of the time     | Yes, sometimes             | Not very often                 | No, not at all  |
| I have felt sad and miserable                              | Yes, most of the time     | Yes, quite often           | Not very often                 | No, not at all  |
| I have been so unhappy that I have been crying             | Yes, most of the time     | Yes, quite often           | Only occasionally              | No, never       |
| The thought of harming myself has occurred to me           | Yes, quite often          | Sometimes                  | Hardly ever                    | Never           |

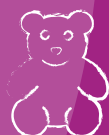

## Part I: Your experience of maternity care...

Women's experience of maternity care is different. How much do you agree with the following statements? Please tick one box for each row

### I1. Thinking about my care during pregnancy...

|                                                                                          | Strongly Agree           | Agree                    | Neither agree or disagree | Disagree                 | Strongly Disagree        |
|------------------------------------------------------------------------------------------|--------------------------|--------------------------|---------------------------|--------------------------|--------------------------|
| I felt I had the right number of antenatal checks with the midwife/doctor                | <input type="checkbox"/> | <input type="checkbox"/> | <input type="checkbox"/>  | <input type="checkbox"/> | <input type="checkbox"/> |
| My care provider(s) gave me all the information I needed                                 | <input type="checkbox"/> | <input type="checkbox"/> | <input type="checkbox"/>  | <input type="checkbox"/> | <input type="checkbox"/> |
| I always saw the same midwife/doctor for my antenatal checks                             | <input type="checkbox"/> | <input type="checkbox"/> | <input type="checkbox"/>  | <input type="checkbox"/> | <input type="checkbox"/> |
| Health professionals did not always talk to me in a way I could understand               | <input type="checkbox"/> | <input type="checkbox"/> | <input type="checkbox"/>  | <input type="checkbox"/> | <input type="checkbox"/> |
| Antenatal appointments were too short to discuss any concerns about my pregnancy         | <input type="checkbox"/> | <input type="checkbox"/> | <input type="checkbox"/>  | <input type="checkbox"/> | <input type="checkbox"/> |
| I was not involved enough in decisions about my antenatal care                           | <input type="checkbox"/> | <input type="checkbox"/> | <input type="checkbox"/>  | <input type="checkbox"/> | <input type="checkbox"/> |
| I was happy with the number of health professionals who cared for me during my pregnancy | <input type="checkbox"/> | <input type="checkbox"/> | <input type="checkbox"/>  | <input type="checkbox"/> | <input type="checkbox"/> |
| I was not given enough explanations about antenatal scans and tests                      | <input type="checkbox"/> | <input type="checkbox"/> | <input type="checkbox"/>  | <input type="checkbox"/> | <input type="checkbox"/> |
| I was not given enough information to make decisions about my antenatal care             | <input type="checkbox"/> | <input type="checkbox"/> | <input type="checkbox"/>  | <input type="checkbox"/> | <input type="checkbox"/> |
| I would have liked more antenatal checks and scans                                       | <input type="checkbox"/> | <input type="checkbox"/> | <input type="checkbox"/>  | <input type="checkbox"/> | <input type="checkbox"/> |
| During pregnancy, I did not feel well cared for by health professionals                  | <input type="checkbox"/> | <input type="checkbox"/> | <input type="checkbox"/>  | <input type="checkbox"/> | <input type="checkbox"/> |
| Overall, I was very pleased with the care I received in pregnancy                        | <input type="checkbox"/> | <input type="checkbox"/> | <input type="checkbox"/>  | <input type="checkbox"/> | <input type="checkbox"/> |

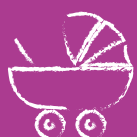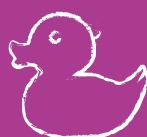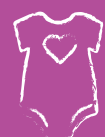

## 12. Thinking about my care during labour and birth...

|                                                                                                                         | Strongly Agree           | Agree                    | Neither agree or disagree | Disagree                 | Strongly Disagree        |
|-------------------------------------------------------------------------------------------------------------------------|--------------------------|--------------------------|---------------------------|--------------------------|--------------------------|
| Staff communicated well with me during labour and birth                                                                 | <input type="checkbox"/> | <input type="checkbox"/> | <input type="checkbox"/>  | <input type="checkbox"/> | <input type="checkbox"/> |
| I needed more staff support during labour and birth                                                                     | <input type="checkbox"/> | <input type="checkbox"/> | <input type="checkbox"/>  | <input type="checkbox"/> | <input type="checkbox"/> |
| Everything was explained to me well during labour and birth                                                             | <input type="checkbox"/> | <input type="checkbox"/> | <input type="checkbox"/>  | <input type="checkbox"/> | <input type="checkbox"/> |
| I was treated as an individual by staff                                                                                 | <input type="checkbox"/> | <input type="checkbox"/> | <input type="checkbox"/>  | <input type="checkbox"/> | <input type="checkbox"/> |
| I was not involved enough in decisions about procedures that were carried out (e.g. breaking waters, caesarean section) | <input type="checkbox"/> | <input type="checkbox"/> | <input type="checkbox"/>  | <input type="checkbox"/> | <input type="checkbox"/> |
| Health professionals left me alone more than I would have liked                                                         | <input type="checkbox"/> | <input type="checkbox"/> | <input type="checkbox"/>  | <input type="checkbox"/> | <input type="checkbox"/> |
| I felt that my pain relief needs were not managed well                                                                  | <input type="checkbox"/> | <input type="checkbox"/> | <input type="checkbox"/>  | <input type="checkbox"/> | <input type="checkbox"/> |
| I felt safe in the labour and birth environment                                                                         | <input type="checkbox"/> | <input type="checkbox"/> | <input type="checkbox"/>  | <input type="checkbox"/> | <input type="checkbox"/> |
| The staff could have done more to help me to feel in control of my labour and birth                                     | <input type="checkbox"/> | <input type="checkbox"/> | <input type="checkbox"/>  | <input type="checkbox"/> | <input type="checkbox"/> |
| I had confidence and trust in the staff caring for me                                                                   | <input type="checkbox"/> | <input type="checkbox"/> | <input type="checkbox"/>  | <input type="checkbox"/> | <input type="checkbox"/> |
| I did not mind being looked after by midwives or doctors I had not met before                                           | <input type="checkbox"/> | <input type="checkbox"/> | <input type="checkbox"/>  | <input type="checkbox"/> | <input type="checkbox"/> |
| I had the best possible care during labour and birth                                                                    | <input type="checkbox"/> | <input type="checkbox"/> | <input type="checkbox"/>  | <input type="checkbox"/> | <input type="checkbox"/> |



### 13. Thinking about my *postnatal* care...

|                                                                                                    | Strongly Agree           | Agree                    | Neither agree or disagree | Disagree                 | Strongly Disagree        |
|----------------------------------------------------------------------------------------------------|--------------------------|--------------------------|---------------------------|--------------------------|--------------------------|
| I received enough care and attention from staff on the postnatal ward                              | <input type="checkbox"/> | <input type="checkbox"/> | <input type="checkbox"/>  | <input type="checkbox"/> | <input type="checkbox"/> |
| I stayed in hospital as long as I wanted after the birth                                           | <input type="checkbox"/> | <input type="checkbox"/> | <input type="checkbox"/>  | <input type="checkbox"/> | <input type="checkbox"/> |
| I was treated as an individual by midwives/ doctors after the birth                                | <input type="checkbox"/> | <input type="checkbox"/> | <input type="checkbox"/>  | <input type="checkbox"/> | <input type="checkbox"/> |
| After I had given birth, health professionals treated me as though I was no longer important       | <input type="checkbox"/> | <input type="checkbox"/> | <input type="checkbox"/>  | <input type="checkbox"/> | <input type="checkbox"/> |
| I had enough information from health professionals about how to care for my baby                   | <input type="checkbox"/> | <input type="checkbox"/> | <input type="checkbox"/>  | <input type="checkbox"/> | <input type="checkbox"/> |
| I was able to build a good relationship with the healthcare professionals I saw after coming home  | <input type="checkbox"/> | <input type="checkbox"/> | <input type="checkbox"/>  | <input type="checkbox"/> | <input type="checkbox"/> |
| I was not given the advice and information I needed by health professionals after my baby was born | <input type="checkbox"/> | <input type="checkbox"/> | <input type="checkbox"/>  | <input type="checkbox"/> | <input type="checkbox"/> |
| There was not enough time to talk over my concerns with health professional                        | <input type="checkbox"/> | <input type="checkbox"/> | <input type="checkbox"/>  | <input type="checkbox"/> | <input type="checkbox"/> |
| I had all the checks I needed after the birth                                                      | <input type="checkbox"/> | <input type="checkbox"/> | <input type="checkbox"/>  | <input type="checkbox"/> | <input type="checkbox"/> |
| After the birth of my baby, I knew who to contact if I had questions or concerns                   | <input type="checkbox"/> | <input type="checkbox"/> | <input type="checkbox"/>  | <input type="checkbox"/> | <input type="checkbox"/> |
| The postnatal care I received did not meet the needs of me and my baby                             | <input type="checkbox"/> | <input type="checkbox"/> | <input type="checkbox"/>  | <input type="checkbox"/> | <input type="checkbox"/> |
| Overall I was very pleased with the quality of my postnatal care                                   | <input type="checkbox"/> | <input type="checkbox"/> | <input type="checkbox"/>  | <input type="checkbox"/> | <input type="checkbox"/> |

## Part J: You and Your Household...

Please answer as many of these questions as you can. This will help us to describe the women taking part in this survey and show whether the care offered to women is the same regardless of their background or circumstances.

**J1. Have you had a previous pregnancy (before this one)?**

☐ Yes ☐ No **If No, please go to Question J4**

**J2. Have you given birth before having this baby?**

☐ Yes ☐ No **If No, please go to Question J4**

**J3. How many babies have you given birth to before this pregnancy?**

babies

**J4. How old are you now?**

years

**J5. How old were you when left full-time education?**

☐ 16 years or less ☐ 17 or 18 years ☐ 19 years or over ☐ Still in full-time education

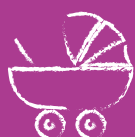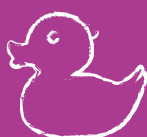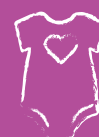

**J6. Which of the following people live with you?**

- ☐ Your baby / other children  
☐ Your spouse / civil partner / partner  
☐ Other family members  
☐ Other, please tell us who: \_\_\_\_\_

**J7. In which country were you born?**

\_\_\_\_\_

**J8. If you were born outside the United Kingdom, what year did you come to the UK?**

**J9. What is your ethnic group?** *Please tick one box only*

**White:**

- ☐ English / Welsh / Scottish / Northern Irish / British  
☐ Irish  
☐ Gypsy or Irish Traveller  
☐ Any other White background

If other, please write in box:

**Mixed:**

- ☐ White & Black Caribbean  
☐ White & Black African  
☐ White & Asian  
☐ Any other Mixed / multiple ethnic background

If other, please write in box:

**Other ethnic group:**

- ☐ Arab  
☐ Any other ethnic background

If other, please write in box:

**Asian or Asian British:**

- ☐ Indian  
☐ Pakistani  
☐ Bangladeshi  
☐ Chinese  
☐ Any other Asian background

If other, please write in box:

**Black or Black British:**

- ☐ Caribbean  
☐ African  
☐ Any other Black/African/Caribbean background

If other, please write in box:

☐ Not stated

**J10. Do you have a longstanding physical health problem or disability?**

- ☐ Yes ☐ No

**J11. Do you have a longstanding mental health problem?**

- ☐ Yes ☐ No

**J12. Do any of the problems or disabilities affect your day-to-day activities?**

- ☐ Yes, definitely ☐ Yes, to some extent ☐ No ☐ Not applicable

**J13. Would you mind telling us what your mental / physical health problem and / or disability is?**



Is there anything else you would like to tell us about yourself, your baby or the care you have received?

Thank  
You

Was there anything else you meant to go back to and complete later?

Please check you haven't missed any pages.

If the survey has raised issues or questions of concern you may wish to contact your family doctor (GP) or health visitor.

Please return the questionnaire in the FREEPOST envelope provided. If you have any queries about the questionnaire or you would like to know more about the research please contact the research team:

Maria Quigley and Sian Harrison

National Perinatal Epidemiology Unit  
University of Oxford  
Old Road Campus  
Headington  
Oxford OX3 7LF

Tel: FREEPHONE 0808 252 4566  
Email: [sian.harrison@npeu.ox.ac.uk](mailto:sian.harrison@npeu.ox.ac.uk)

you &  
your Baby

A national survey of health and care

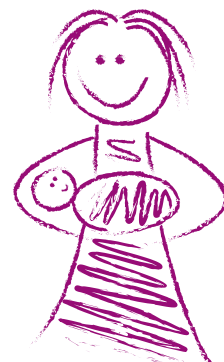

Supplement: Supplementary file 2 — You and Your Baby: A national survey of health and care. Pilot survey 2 questionnaire. (PDF 1852 kb) [file 12874_2019_702_MOESM2_ESM.pdf]
